# Supplementary material
Source: publisher site journal article supplement (https://www.dovepress.com/article/572866)

Supplementary Materials

**Table S1** Summary of Animal Group Allocation and Exclusions

| Group | Initial Number (n) | Failed Injection (n) | Mortalities (n) | Exclusion (n) | Reason for Exclusion | Final Number (n) |
| --- | --- | --- | --- | --- | --- | --- |
| Con | 11 | 0 | 0 | 0 | / | 11 |
| E.coil | 13 | 1 | 2 | 3 | Unsuccessful injection; Premature death | 10 |
| E.coil+L-FSHJ | 12 | 0 | 0 | 0 | / | 12 |
| E.coil+M-FSHJ | 12 | 0 | 1 | 1 | Premature death | 11 |
| E.coil+H-FSHJ | 12 | 1 | 2 | 3 | Unsuccessful injection; Premature death | 9 |
| **Total** | 60 | 2 | 5 | 7 | / | 53 |

Table S1 : The inclusion and exclusion of experimental animals are summarized in Table S1. Briefly, 60 mice were initially randomized into groups. Each group, consisting of 11-13 mice, was housed in two cages with 5-7 animals per cage. Following the exclusion of mortalities and the case of failed injection, 53 mice were retained for the final analysis.

**Table S2** The components of the FSHJ within the "component - targets -diseases network"

| Betweenness Centrality | Closeness Centrality | Degree | Name | Type | Mol ID |
| --- | --- | --- | --- | --- | --- |
| 0.060334444 | 0.432250153 | 165 | Quercetin | Multidrug | MOL000098 |
| 0.00960614 | 0.378828587 | 65 | Luteolin | Mahuang | MOL000006 |
| 0.009085463 | 0.370467683 | 60 | Morphine | Sharen | MOL006979 |
| 0.008982701 | 0.374005305 | 60 | 3beta-hydroxyurs-12-en-28-syre | Mahuang | MOL000511 |
| 0.007827918 | 0.363214838 | 57 | Honokiol | Baifupian | MOL005955 |
| 0.005741758 | 0.370857443 | 49 | Wogonin | Mahuang | MOL000173 |
| 0.006330151 | 0.370467683 | 49 | Kaempferol | Mahuang | MOL000422 |
| 0.004283618 | 0.343065693 | 44 | Cholesterol | Cuguijia | MOL000953 |
| 0.004339106 | 0.347119645 | 41 | Vitamin d3 | Cuguijia | MOL010861 |
| 0.004314109 | 0.364718055 | 40 | Delphinidin | Mahuang | MOL004798 |
| 0.005894184 | 0.371639431 | 32 | Rutin | Multidrug |  |
| 0.002439476 | 0.352323838 | 28 | Sanguinarine | Sharen |  |
| 0.003953568 | 0.367378843 | 27 | Oleic acid | Multidrug |  |
| 0.002624259 | 0.360613811 | 27 | Naringenin | Mahuang |  |
| 0.001779902 | 0.34107402 | 26 | Isoliquiritigenin | Zhigancao |  |
| 0.002072041 | 0.353383459 | 25 | Caffeic acid | Sharen |  |
| 0.001652672 | 0.354806241 | 23 | Ellipticine | Sharen |  |
| 0.001765713 | 0.353738083 | 23 | (e,z)-farnesol | Mahuang |  |
| 0.001525883 | 0.348148148 | 22 | Gallic acid | Sharen |  |
| 0.001753838 | 0.357323872 | 22 | Cinnamaldehyde | Mahuang |  |
| 0.001080021 | 0.340744321 | 18 | Higenamine | Baifupian |  |
| 0.00202187 | 0.365095805 | 18 | Dibutyl phthalate | Multidrug |  |
| 0.000721852 | 0.352676338 | 17 | Sw219122-1 | Mahuang |  |
| 0.001073041 | 0.34107402 | 17 | Glycyrrhizic acid | Zhigancao |  |
| 0.002527329 | 0.365474339 | 16 | Linoleic acid | Multidrug |  |
| 0.000838043 | 0.35409342 | 15 | Eupatilin | Mahuang |  |
| 0.000701029 | 0.353383459 | 15 | 3,4-dihydroxybenzoate | Mahuang |  |
| 0.000664894 | 0.33145275 | 14 | Juglone | Baifupian |  |
| 0.002331493 | 0.365095805 | 14 | Palmitic acid | Multidrug |  |
| 0.0011508 | 0.357323872 | 14 | Linolenic acid | Multidrug |  |
| 0.000640122 | 0.341404358 | 14 | Citral | Ganjiang |  |
| 0.000734921 | 0.352676338 | 14 | Coumarin | Mahuang |  |
| 0.000685722 | 0.353738083 | 14 | Chembl2111558 | Mahuang |  |
| 0.000965607 | 0.348492338 | 14 | Styrene | Mahuang |  |
| 0.00079511 | 0.351972042 | 14 | Caffeic acid phenethyl ester | Mahuang |  |
| 0.001043178 | 0.350920856 | 14 | Pseudoephedrine | Mahuang |  |
| 0.000743543 | 0.351620948 | 13 | D-limonene | Multidrug |  |
| 0.000557723 | 0.350223547 | 13 | Diosmetin | Mahuang |  |
| 0.001596511 | 0.363589479 | 12 | Beta-sitosterol | Multidrug |  |
| 0.000685022 | 0.350920856 | 12 | 17654-19-2 | Mahuang |  |
| 0.000855254 | 0.361723961 | 11 | Eucalyptol | Multidrug |  |
| 0.001184377 | 0.358049771 | 11 | Stigmasterol | Multidrug |  |
| 0.001048547 | 0.350920856 | 11 | Lauric acid | Multidrug |  |
| 0.000479539 | 0.339431873 | 11 | 6-shogaol | Ganjiang |  |
| 0.000441893 | 0.32745007 | 11 | Glycyrrhetin | Zhigancao |  |
| 0.000389985 | 0.344743276 | 10 | Germacrone | Sharen |  |
| 0.000435649 | 0.342399223 | 10 | Vanillin | Sharen |  |
| 0.000414798 | 0.337159254 | 10 | Farnesol | Ganjiang |  |
| 0.001021818 | 0.349529003 | 10 | Dtxsid3022821 | Multidrug |  |
| 0.000352147 | 0.351270553 | 10 | Hesperidin | Mahuang |  |
| 0.000548277 | 0.347119645 | 10 | Benzene | Mahuang |  |
| 0.001451324 | 0.360983103 | 9 | Stearic acid | Multidrug |  |
| 0.00039355 | 0.334916865 | 9 | Nicotinic acid | Sharen |  |
| 0.000649093 | 0.344406448 | 9 | Retinal | Mahuang |  |
| 0.000232722 | 0.348492338 | 9 | Aucubin | Mahuang |  |
| 0.000429731 | 0.329901731 | 8 | Papaverine | Sharen |  |
| 0.000510124 | 0.335874226 | 8 | Isoquercitrin | Multidrug |  |
| 0.000440297 | 0.343065693 | 8 | Eugenol | Multidrug |  |
| 0.000311042 | 0.340415258 | 8 | Hyperoside | Sharen |  |
| 0.000255356 | 0.33428165 | 8 | Ginkgetin | Ganjiang |  |
| 0.000368677 | 0.347119645 | 8 | Cinnamic acid | Mahuang |  |
| 0.000551795 | 0.343065693 | 8 | L-ascorbic acid | Mahuang |  |
| 0.000392498 | 0.344406448 | 8 | Taxifolin | Mahuang |  |
| 0.000357588 | 0.349182764 | 8 | Vitexin | Mahuang |  |
| 0.000562463 | 0.341735337 | 8 | Cholic acid | Mahuang |  |
| 0.000465986 | 0.355521936 | 7 | Vanillic acid | Multidrug |  |
| 0.000585239 | 0.353383459 | 7 | Toluene | Multidrug |  |
| 0.000472837 | 0.359877489 | 7 | Methyl palmitate | Multidrug |  |
| 0.000257985 | 0.345080764 | 7 | Pectolinarigenin | Mahaung |  |
| 0.000263218 | 0.329285381 | 6 | Papaverine hydrochloride | Sharen |  |
| 0.000557108 | 0.357686454 | 6 | Linalool | Multidrug |  |
| 0.000309328 | 0.350571855 | 6 | Hexanal | Multidrug |  |
| 0.00016398 | 0.329901731 | 6 | Geraniin | Ganjiang |  |
| 0.000387826 | 0.343065693 | 6 | Phenol | Mahuang |  |
| 0.000236623 | 0.345418912 | 6 | Naphthalene | Mahuang |  |
| 0.000174844 | 0.346097202 | 6 | Safrole | Mahuang |  |
| 0.000351135 | 0.340744321 | 6 | Isradipine | Mahuang |  |
| 0.000160748 | 0.346097202 | 6 | Delphinidin chloride | Mahuang |  |
| 0.00043679 | 0.34107402 | 6 | Menadiol sodium diphosphate | Mahuang |  |
| 0.000324902 | 0.358049771 | 5 | (-)-alpha-terpineol | Multidrug |  |
| 0.000308219 | 0.353383459 | 5 | (-)-limonene | Multidrug |  |
| 0.000330941 | 0.330830596 | 5 | Ergotamine | Sharen |  |
| 0.000180442 | 0.339759036 | 5 | (-)-borneol | Multidrug |  |
| 0.000171762 | 0.344406448 | 5 | Beta-elemene | Multidrug |  |
| 0.000125589 | 0.337482049 | 5 | Alpha-amyrin | Sharen |  |
| 0.000356435 | 0.358778626 | 5 | (3r,6e)-nerolidol | Multidrug |  |
| 0.000340688 | 0.35409342 | 5 | (+)-catechin | Multidrug |  |
| 0.000110574 | 0.331764706 | 5 | Zingerone | Ganjiang |  |
| 8.8537E-05 | 0.334916865 | 5 | Hexahydrocurcumin | Ganjiang |  |
| 0.00017721 | 0.324436263 | 5 | Adenosine | Ganjiang |  |
| 0.000130791 | 0.32745007 | 5 | Geraniol | Ganjaing |  |
| 9.26993E-05 | 0.348148148 | 5 | Trioxsalen | Mahuang |  |
| 0.000350763 | 0.342732134 | 5 | Phenethylamine | Mahaung |  |
| 0.000160593 | 0.344070278 | 5 | (2e,4e)-deca-2,4-dienal | Mahaung |  |
| 0.00037271 | 0.34107402 | 5 | Afzelin | Mahaung |  |
| 0.00017445 | 0.344743276 | 5 | Beta-bourbonene | Mahuang |  |
| 0.000165051 | 0.3259362 | 5 | Astragalin | Zhigancao |  |
| 0.000199754 | 0.354449472 | 4 | Humulene | Multidrug |  |
| 0.000267459 | 0.358413828 | 4 | (-)-alpha-pinene | Multidrug |  |
| 0.000314396 | 0.353029544 | 4 | Acitretin | Multidrug |  |
| 0.000283385 | 0.35660091 | 4 | Camphor | Multidrug |  |
| 0.000199995 | 0.353029544 | 4 | (+)-terpinen-4-ol | Multidrug |  |
| 0.000267459 | 0.358413828 | 4 | Heptadecane | Multidrug |  |
| 0.00012102 | 0.326842837 | 4 | 10-gingerol | Ganjiang |  |
| 0.000195067 | 0.347461804 | 4 | Dimethyl fumarate | Multidrug |  |
| 5.75658E-05 | 0.328978068 | 4 | (+)-borneol | Ganjaing |  |
| 7.51468E-05 | 0.344406448 | 4 | Eriodictyol | Mahuang |  |
| 0.000155694 | 0.34107402 | 4 | Ephedrine | Mahuang |  |
| 0.000155124 | 0.343399903 | 4 | Ethyl acetate | Mahaung |  |
| 0.00014927 | 0.340744321 | 4 | Norephedrine | Mahuang |  |
| 9.61083E-05 | 0.343734764 | 4 | Tricin | Mahuang |  |
| 0.000109765 | 0.322950069 | 4 | Ammonium glycyrrhizate | Zhigancao |  |
| 5.64386E-05 | 0.31431119 | 3 | Mesoridazine | Baifupian |  |
| 0.000262242 | 0.351620948 | 3 | Dimethyl phthalate | Multidrug |  |
| 6.91361E-05 | 0.328671329 | 3 | 3-carene | Sharen |  |
| 7.53474E-05 | 0.340415258 | 3 | 4-carvomenthenol | Multidrug |  |
| 7.56045E-05 | 0.331764706 | 3 | Isocaryophyllene | Sharen |  |
| 6.05077E-05 | 0.336194564 | 3 | Carvone | Sharen |  |
| 6.36308E-05 | 0.330520394 | 3 | Malathion | Sharen |  |
| 0.00014843 | 0.351972042 | 3 | (e,7r,11r)-15-methyl-3,7,11-tri((113c)methyl)(1,5,9,13,16-13c5)hexadec-2-en-1-ol | Multidrug |  |
| 7.55535E-05 | 0.340415258 | 3 | Beta-ionone | Multidrug |  |
| 8.38268E-05 | 0.337159254 | 3 | Caryophyllene | Multidrug |  |
| 0.000100556 | 0.330830596 | 3 | L-lactic acid | Sharen |  |
| 0.000101519 | 0.349529003 | 3 | Carvacrol | Multidrug |  |
| 0.000190367 | 0.346437346 | 3 | Ethyl palmitate | Multidrug |  |
| 9.64597E-05 | 0.349182764 | 3 | Citronellol | Multidrug |  |
| 9.3509E-05 | 0.348837209 | 3 | Tetradecane | Multidrug |  |
| 6.06628E-05 | 0.343065693 | 3 | 2,3,5,6-tetramethylpyrazine | Mahuang |  |
| 0.000138184 | 0.339759036 | 3 | Safranal | Mahuang |  |
| 6.07863E-05 | 0.340744321 | 3 | Squalene | Mahuang |  |
| 7.34657E-05 | 0.340086831 | 3 | Methylephedrine | Mahuang |  |
| 0.00012807 | 0.343734764 | 3 | 3,4-dihydroxybenzoic acid | Mahuang |  |
| 9.32857E-05 | 0.342732134 | 3 | Thymol | Mahuang |  |
| 7.34657E-05 | 0.340086831 | 3 | Pseudoephedrine hydrochloride | Mahuang |  |
| 2.67838E-05 | 0.313472655 | 2 | Aconitine | Baifupian |  |
| 2.37764E-05 | 0.312638581 | 2 | Uracil | Baifupian |  |
| 2.15511E-05 | 0.313194136 | 2 | Mescaline | Biafupian |  |
| 2.75625E-05 | 0.313472655 | 2 | Isotalatizidine | Baifupian |  |
| 2.29518E-05 | 0.334598956 | 2 | Ergosterol | Sharen |  |
| 4.47699E-05 | 0.327754533 | 2 | Codeine | Sharen |  |
| 6.87622E-05 | 0.327754533 | 2 | Glycerol | Sharen |  |
| 6.87622E-05 | 0.327754533 | 2 | Guaiol | Sharen |  |
| 1.83193E-05 | 0.329901731 | 2 | Myrtenal | Sharen |  |
| 6.33847E-05 | 0.328059563 | 2 | Chloramphenicol | Sharen |  |
| 6.87622E-05 | 0.327754533 | 2 | Sphingosine | Sharen |  |
| 2.71329E-05 | 0.329593268 | 2 | Linalyl acetate | Sharen |  |
| 4.63715E-05 | 0.328059563 | 2 | (e)-2-epi-beta-caryophyllene | Sharen |  |
| 2.0835E-05 | 0.323246217 | 2 | Isoginkgetin | Ganjaing |  |
| 1.54933E-05 | 0.324137931 | 2 | Methyltestosterone | Ganjiang |  |
| 7.58719E-05 | 0.339759036 | 2 | Methyleugenol | Mahuang |  |
| 6.06563E-05 | 0.339431873 | 2 | 4-hydroxybenzoic acid | Mahuang |  |
| 6.38176E-05 | 0.339431873 | 2 | Maslinic acid | Mahaung |  |
| 4.62675E-05 | 0.339759036 | 2 | 69884-00-0 | Mahaung |  |
| 2.08831E-05 | 0.342732134 | 2 | D-citronellol | Mahaung |  |
| 2.67538E-05 | 0.339431873 | 2 | M-xylene | Mahuang |  |
| 3.29629E-05 | 0.340744321 | 2 | Cathine | Mahuang |  |
| 2.21982E-05 | 0.343399903 | 2 | Herbacetin | Mahuang |  |
| 9.27596E-05 | 0.339431873 | 2 | 4-methylphenol | Mahuang |  |
| 6.76212E-05 | 0.339431873 | 2 | Trans-2-nonenal | Mahuang |  |
| 2.75726E-05 | 0.339431873 | 2 | Phenanthrene | Mahuang |  |

**Table S3** A total of 25 active components in FSHJ were identified through LM-SC

| NO. | Name | Formula | Annot. DeltaMass [ppm] | m/z | RT [min] | mzCloud Best Match |
| --- | --- | --- | --- | --- | --- | --- |
| 1 | Azelaic acid | C9H16O4 | -4.07 | 187.09682 | 15.21 | 99.6 |
| 2 | Formononetin | C16H12O4 | -1.47 | 267.06589 | 18.583 | 99.5 |
| 3 | (15Z)-9,12,13-Trihydroxy-15-octadecenoic acid | C18H34O5 | -1.23 | 329.23294 | 22.241 | 99.1 |
| 4 | 2-(acetylamino)-3-(1H-indol-3-yl)propanoic acid | C13H14N2O3 | -2.15 | 245.09264 | 12.491 | 99 |
| 5 | D-(+)-Tryptophan | C11H12N2O2 | -1.37 | 203.08232 | 4.185 | 98.9 |
| 6 | Tetramethylpyrazine | C8H12N2 | 0.49 | 137.10739 | 5.48 | 98.7 |
| 7 | Gentisic acid | C7H6O4 | -4.65 | 153.0186 | 2.824 | 98.3 |
| 8 | Maltol | C6H6O3 | -1.09 | 127.03883 | 19.895 | 98.2 |
| 9 | Corchorifatty acid F | C18H32O5 | -0.75 | 327.21744 | 20.748 | 97.9 |
| 10 | Pimelic acid | C7H12O4 | -4.75 | 159.06552 | 6.929 | 97.7 |
| 11 | Afzelin | C21H20O10 | -0.91 | 431.09796 | 15.982 | 97.7 |
| 12 | Caffeic acid | C9H8O4 | -3.35 | 179.03438 | 6.812 | 97.4 |
| 13 | Quercetin-3β-D-glucoside | C21H20O12 | -0.4 | 463.08801 | 13.039 | 96.4 |
| 14 | Suberic acid | C8H14O4 | -4.43 | 173.08116 | 11.301 | 96.3 |
| 15 | Catechin | C15H14O6 | -1.21 | 289.07141 | 8.243 | 95.7 |
| 16 | Phloroglucinol | C6H6O3 | -0.06 | 127.03896 | 8.95 | 94.9 |
| 17 | Aconitine | C34H47NO11 | -2.72 | 646.32043 | 20.95 | 92.8 |
| 18 | Xanthurenic acid | C10H7NO4 | -1.88 | 204.02985 | 3.078 | 91.6 |
| 19 | Dodecanedioic acid | C12H22O4 | -2.04 | 229.14406 | 22.778 | 90.9 |
| 20 | (±)-Abscisic acid | C15H20O4 | -0.92 | 263.12866 | 17.595 | 87.7 |
| 21 | Prostaglandin F1α | C20H36O5 | -1.05 | 355.24863 | 24.852 | 86.8 |
| 22 | 2,3-Dinor-8-epi-prostaglandin F2α | C18H30O5 | -0.87 | 325.20176 | 26.458 | 86.5 |
| 23 | 4-Aminoantipyrine | C11H13N3O | 2.51 | 204.11365 | 35.005 | 85.9 |
| 24 | Thymidine | C10H14N2O5 | 0.39 | 241.08293 | 2.272 | 85.4 |
| 25 | 3,4-Dihydroxybenzaldehyde | C7H6O3 | -0.44 | 139.03891 | 5.736 | 85.2 |

**Figure S1** Western blot analysis for TLR4 and NF-κB p65 from three independent experiments


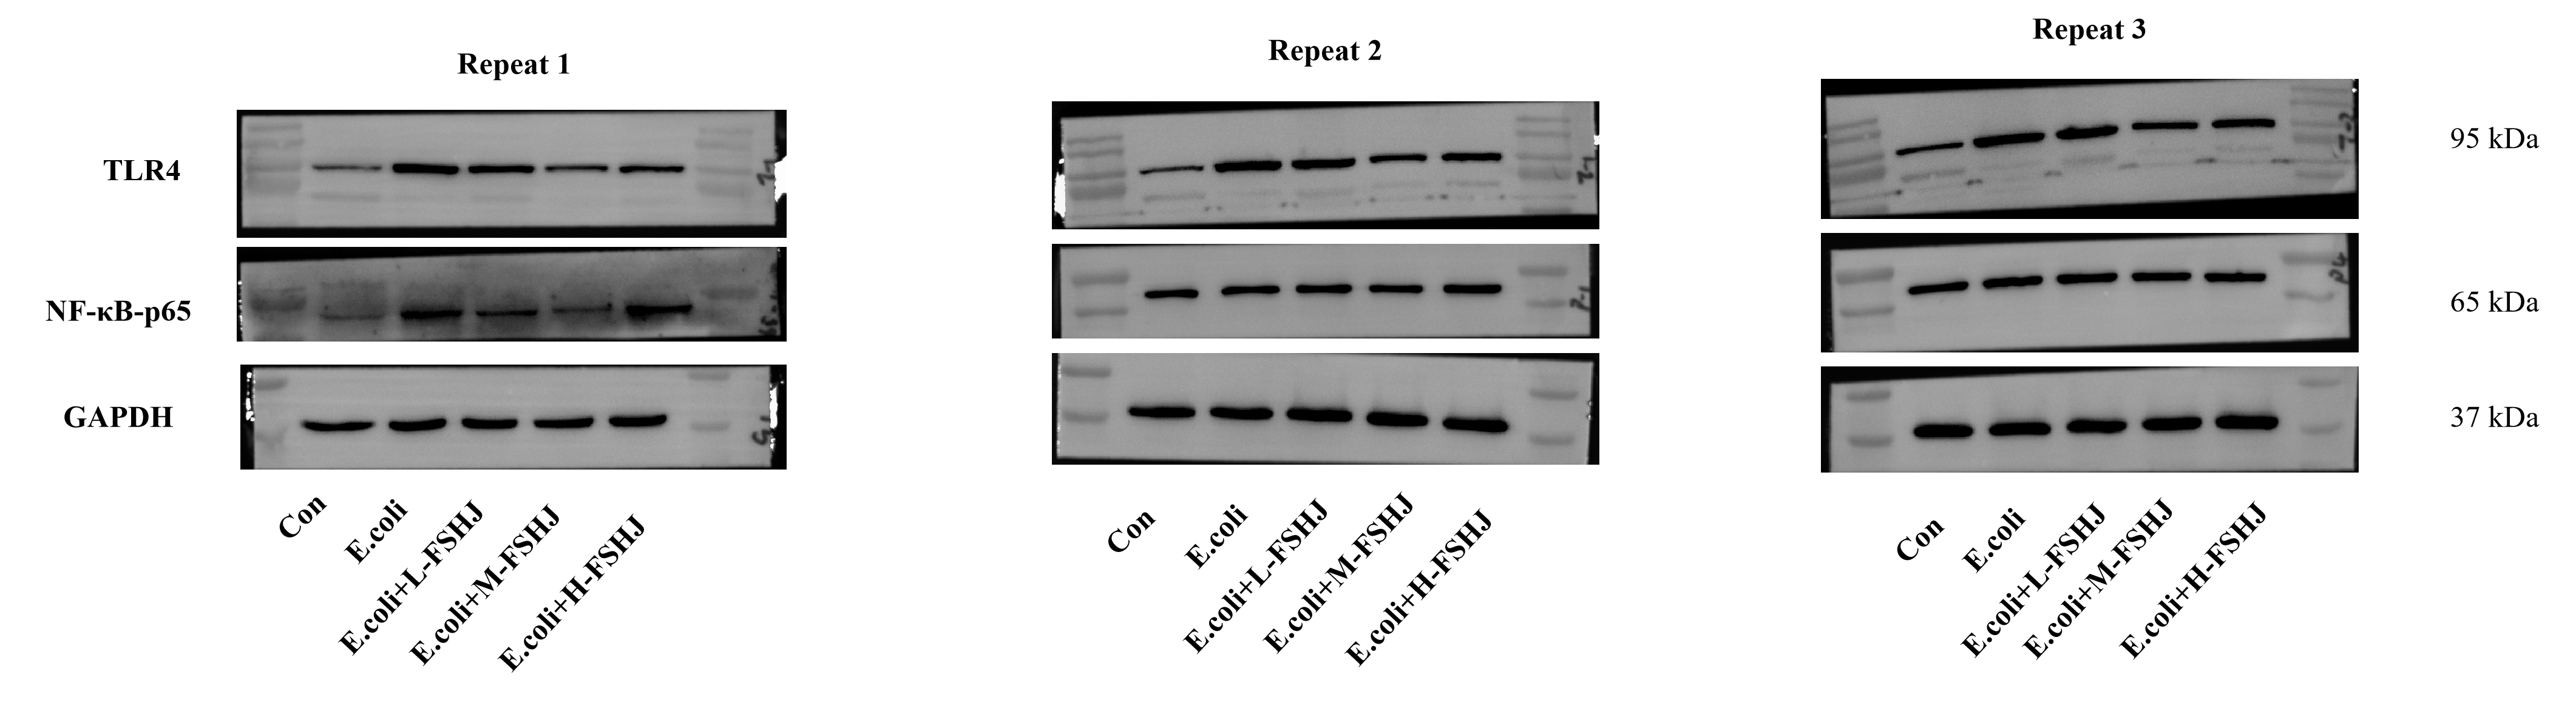

Supplement: Supplementary file 1 [file 572866%20Supplementary%20Materials.docx]
